# Supplementary material
Source: publisher site journal article supplement (https://www.dovepress.com/article/544365)
Supplement: Supplementary file 1 [file Supplementary%20Tables%201-7.docx]

Supplementary Table S1. Baseline Characteristics Stratified by Surgical Technique

| Characteristic | Laser Resection (n=45) | Plasma Surgery (n=28) | Partial Laryngectomy (n=16) | P-value |
| --- | --- | --- | --- | --- |
| Demographics |  |  |  |  |
| Age (years), mean ± SD | 66.3 ± 7.1 | 64.9 ± 6.3 | 65.3 ± 7.0 | 0.694 |
| Male gender, n (%) | 38 (84.4) | 25 (89.3) | 14 (87.5) | 0.834 |
| BMI (kg/m2), mean ± SD | 22.3 ± 2.3 | 23.2 ± 2.7 | 23.0 ± 1.6 | 0.852 |
| Risk Factors |  |  |  |  |
| Smoking, n (%) | 22 (48.9) | 16 (57.1) | 7 (43.8) | 0.660 |
| Alcohol consumption, n (%) | 16 (35.6) | 11 (39.3) | 6 (37.5) | 0.949 |
| Treatment Groups | |  |  |  |
| PPI group, n (%) | 16 (35.6) | 13 (46.4 | 3 (18.8) | 0.183 |
| Non-PPI group, n (%) | 29 (64.4) | 15 (53.6) | 13 (81.3) |  |
| Tumor Characteristics | |  |  |  |
| T stage, n (%) | |  |  | 0.751 |
| T1 | 28 (62.2) | 20 (71.4) | 9 (56.3) |  |
| T2 | 10 (22.2) | 5 (17.9) | 3 (18.8) |  |
| T3 | 7 (15.6) | 3 (10.7) | 4 (25.0) |  |
| Tumor differentiation, n (%) | | |  | 0.735 |
| Well | 32 (71.1) | 20 (71.4) | 10 (62.5) |  |
| Moderate | 12 (26.7) | 8 (28.6) | 5 (31.3) |  |
| Poor | 1 (2.2) | 0 (0.00) | 1 (6.3) |  |
| Anatomical Subsite, n (%) | |  |  | 0.322 |
| Glottic | 35 (77.8) | 20 (71.4) | 8 (50.0) |  |
| Supraglottic | 8 (17.8) | 7 (25.0) | 7 (43.8) |  |
| Subglottic | 2 (4.4) | 1 (3.6) | 1 (6.3) |  |

P-values calculated using ANOVA for continuous variables and chi-square test for categorical variables. BMI = body mass index; PPI = proton pump inhibitor.

Supplementary Table S2. Baseline Characteristics Stratified by Anatomical Subsite

| Characteristic | Glottic (n=63) | Supraglottic (n=22) | Subglottic (n=4) | P-value |
| --- | --- | --- | --- | --- |
| Demographics | |  |  |  |
| Age (years), mean ± SD | 64.9 ± 7.2 | 68.1 ± 5.0 | 64.5 ± 5.8 | 0.142 |
| Male gender, n (%) | 58 (92.1) | 15 (68.2) | 4 (100.0) | 0.013 |
| BMI (kg/m2), mean ± SD | 23.2 ± 2.4 | 22.4 ± 2.1 | 23.2 ± 0.4 | 0.309 |
| Risk Factors | |  |  |  |
| Smoking, n (%) | 30 (47.6) | 12 (54.6) | 3 (75) | 0.519 |
| Alcohol consumption, n (%) | 23 (36.5) | 7 (31.8) | 3 (50.0) | 0.255 |
| Treatment Groups | |  |  |  |
| PPI group, n (%) | 26 (41.3) | 4 (18.2) | 2 (50.0) | 0.127 |
| Non-PPI group, n (%) | 37 (58.7) | 18 (81.8) | 2 (50.0) |  |
| Tumor Characteristics | | |  |  |
| T stage, n (%) | |  |  | 0.186 |
| T1 | 42 (66.7) | 14 (63.4) | 1 (25) |  |
| T2 | 14 (22.2) | 3 (13.6) | 1 (25) |  |
| T3 | 7 (11.1) | 5 (22.7) | 2 (50.0) |  |
| Tumor differentiation, n (%) | | | | 0.576 |
| Well | 46 (73.0) | 14 (63.6) | 2 (50) |  |
| Moderate | 15 (23.8) | 8 (36.4) | 2 (50) |  |
| Poor | 2 (3.2) | 0 (0.0) | 0 (0.0) |  |
| Surgical Technique, n (%) | | |  | 0.322 |
| Laser resection | 35 (55.6) | 8 (36.4) | 2 (50.0) |  |
| Plasma surgery | 20 (31.7) | 7 (31.8) | 1 (25.0) |  |
| Partial laryngectomy | 8 (12.7) | 7 (31.8) | 1 (25.0) |  |

P-values calculated using ANOVA for continuous variables and chi-square test for categorical variables. BMI = body mass index; PPI = proton pump inhibitor.

Supplementary Table S3. Granulation Tissue Outcomes Stratified by Surgical Technique

| Outcome | Laser Resection (n=45) | Plasma Surgery (n=28) | Partial Laryngectomy (n=16) | P-value |
| --- | --- | --- | --- | --- |
| Granulation Formation | | |  |  |
| Overall incidence, n (%) | 27 (60.0) | 17 (60.7) | 10 (62.5) | 0.985 |
| PPI group, n (%) | 10 (62.5) | 9 (69.2) | 2 (66.7) | 0.930 |
| Non-PPI group, n (%) | 17 (58.6) | 8 (53.3) | 8 (61.5) | 0.903 |
| Granulation Duration (weeks) | | | |  |
| Overall, Median (Q1, Q3) | 8.0 (4.0, 8.0) | 5.0 (4.0, 8.2) | 8.0 (6.0, 8.0) | 0.476 |
| PPI group, Median (Q1, Q3) | 4.0 (4.0, 5.0) | 4.0 (4.0, 5.0) | 6.0 (5.0, 7.0) | 0.068 |
| Non-PPI group, Median (Q1, Q3) | 8.0 (8.0, 9.0) | 8.0 (5.0, 10.0) | 8.0 (6.0, 8.0) | 0.783 |
| P-value (PPI vs non-PPI) | <0.001 | <0.001 | 0.147 |  |

Mean difference (95% confidence interval) between PPI and non-PPI groups. Analysis conducted only among patients who developed granulation tissue (n=54). PPI = proton pump inhibitor.

Supplementary Table S4. Granulation Tissue Outcomes Stratified by Anatomical Subsite

| Outcome | Glottic (n=63) | Supraglottic (n=22) | Subglottic (n=4) | P-value |
| --- | --- | --- | --- | --- |
| Granulation Formation | | |  |  |
| Overall incidence, n (%) | 41 (65.1) | 12 (54.6) | 1 (25) | 0.236 |
| PPI group, n (%) | 17 (65.4) | 3 (75.0) | 1 (50.0) | 1.000 |
| Non-PPI group, n (%) | 24 (64.9) | 9 (50.0) | 0 (0.00) | 0.154 |
| Granulation Duration (weeks) | | | |  |
| Overall, Median (Q1, Q3) | 6.0 (4.0, 8.0) | 8.0 (7.5, 9.5) | 4.0 (4.0, 4.0) | 0.101 |
| PPI group, Median (Q1, Q3) | 4.0 (4.0, 5.0) | 6.0 (5.0, 6.0) | 4.0 (4.0, 4.0) | 0.179 |
| Non-PPI group, Median (Q1, Q3) | 8.0 (7.5, 10.0) | 8.0 (8.0, 11.0) | 0.4 (0.3, 1.2) | 0.336 |
| P-value (PPI vs non-PPI) | <0.001 | <0.006 | 0.500 |  |

Mean difference (95% confidence interval) between PPI and non-PPI groups. Analysis conducted only among patients who developed granulation tissue (n=54). PPI = proton pump inhibitor.

Supplementary Table S5. Reflux Index Changes Stratified by Surgical Technique and Anatomical Subsite

| Stratification | Category | RSI Change Score | |  | RFS Change Score | |  |
| --- | --- | --- | --- | --- | --- | --- | --- |
|  |  | PPI Group | Non-PPI Group | P-value | PPI Group | Non-PPI Group | P-value |
| Surgical Technique | | |  |  |  |  |  |
|  | Laser resection | 14.0 (12.8, 16.0) | 3.0 (3.0, 4.0) | <0.001 | 8.0 (6.5, 9.0) | 2.0 (1.0, 3.0) | <0.001 |
|  | Plasma surgery | 15.0 (13.0, 16.0) | 4.0 (3.5, 4.0) | <0.001 | 8.0 (7.0, 9.0) | 2.0 (1.0, 4.0) | <0.001 |
|  | Partial laryngectomy | 13.0 (12.5, 15.0) | 4.0 (3.0, 4.0) | <0.001 | 7.0 (6.0, 8.0) | 3.0 (1.0, 3.0) | <0.001 |
| Anatomical Subsite | | |  |  |  |  |  |
|  | Glottic | 15.0 (13.0, 16.0) | 4.0 (3.0, 4.0) | <0.001 | 8.0 (6.2, 9.0) | 2.0 (1.0, 3.0) | <0.001 |
|  | Supraglottic | 13.5 (13.0, 14.2) | 4.0 (3.0, 4.0) | <0.001 | 7.5 (7.0, 8.2) | 3.0 (2.0, 4.0) | <0.002 |
|  | Subglottic | 9.5 (8.8, 10.2) | 4.0 (4.0, 4.0) | 0.102 | 5.0 (4.0, 6.0) | 4.0 (4.0, 4.0) | 1.000 |

Data presented as mean ± standard deviation. Change score calculated as pretreatment value minus posttreatment value; higher values indicate greater improvement. RSI = Reflux Symptom Index; RFS = Reflux Finding Score; PPI = proton pump inhibitor.

Supplementary Table S6. Multivariate Analysis of PPI Effect on Granulation Duration by Surgical Technique

| Surgical Technique | n with Granulation | Unadjusted β (95% CI) | P-value | Adjusted β (95% CI) | P-value | P for Interaction |
| --- | --- | --- | --- | --- | --- | --- |
| Overall Effect | 54 | -4.19 (-5.15, -3.23) | <0.001 | -4.09 (-5.10, -3.08) | <0.001 | - |
| Stratified Analysis | | |  |  |  |  |
| Laser resection | 27 | -4.25 (-5.65, -2.85) | <0.001 | -4.02 (-5.57, -2.48) | <0.001 | 0.863 |
| Plasma surgery | 17 | -5.18 (-6.48, -3.88) | <0.001 | -5.85 (-7.88, -3.81) | <0.001 |  |
| Partial laryngectomy | 10 | -2.75 (-6.10, -0.60) | 0.147 | -6.00 (-8.26, -3.74) | 0.014 |  |

Adjusted for age, gender, smoking status, alcohol consumption, T stage, and tumor differentiation. β coefficient represents the reduction in granulation duration (weeks) associated with PPI use. CI = confidence interval; PPI = proton pump inhibitor.

Supplementary Table S7. Multivariate Analysis of PPI Effect on Granulation Duration by Anatomical Subsite

| Anatomical Subsite | n with Granulation | Unadjusted β (95% CI) | P-value | Adjusted β (95% CI) | P-value | P for Interaction |
| --- | --- | --- | --- | --- | --- | --- |
| Overall Effect | 54 | -4.19 (-5.15, -3.23) | <0.001 | -4.09 (-5.10, -3.08) | <0.001 | - |
| Stratified Analysis | | |  |  |  |  |
| Glottic | 41 | -4.06 (-5.17, -2.96) | <0.001 | -3.77 (-5.03, -2.50) | <0.001 | 0.121 |
| Supraglottic | 12 | -4.00 (-6.21, -1.79) | 0.005 | -7.58 (-9.30, -5.86) | <0.001 |  |
| Subglottic | 1 | NA | NA | NA | NA |  |

Adjusted for age, gender, smoking status, alcohol consumption, T stage, and tumor differentiation. β coefficient represents the reduction in granulation duration (weeks) associated with PPI use. CI = confidence interval; PPI = proton pump inhibitor.
